# Supplementary material for: Time series modeling of live-cell shape dynamics for image-based phenotypic profiling
Source: Royal Society of Chemistry journal article supplement (doi:10.1039/c5ib00283d), 2015-11-26
Supplement: c5ib00283d1.zip [file c5ib00283d1.zip]

## Sheet: Sheet1
Area
Perimeter
EquivDiameter
MajorAxisLength
MinorAxisLength
Eccentricity
Solidity
Extent
ConvexArea
AxisRatio
Circularity
Waviness
GeoDiameter
ConvexPerimeter
FeretMax
FeretMin
FeretMean
FeretCV
