# Supplementary material for: Time series modeling of live-cell shape dynamics for image-based phenotypic profiling
Source: Royal Society of Chemistry journal article supplement (doi:10.1039/c5ib00283d), 2015-11-26
Supplement: c5ib00283d1.zip [file c5ib00283d1.zip]

Archive with 100 entries (93 files):
- Software/
- Software/data/
- Software/data/DemoData.mat
- Software/data/Demo_SAPHIRE_models.mat
- Software/Demo Instructions.pdf
- Software/Demo.m
- Software/Features.xlsx
- Software/SAPHIRE Package/
- Software/SAPHIRE Package/compute_features.m
- Software/SAPHIRE Package/compute_pheno_signature.m
- Software/SAPHIRE Package/Feature Scripts/
- Software/SAPHIRE Package/Feature Scripts/imChamferDistance.m
- Software/SAPHIRE Package/Feature Scripts/imFeretDiameter.m
- Software/SAPHIRE Package/Feature Scripts/imFindLabels.m
- Software/SAPHIRE Package/Feature Scripts/imGeodesicDiameter.m
- Software/SAPHIRE Package/Feature Scripts/im_ functions license.txt
- Software/SAPHIRE Package/Feature Scripts/wcf_Area.m
- Software/SAPHIRE Package/Feature Scripts/wcf_AxisRatio.m
- Software/SAPHIRE Package/Feature Scripts/wcf_Circularity.m
- Software/SAPHIRE Package/Feature Scripts/wcf_ConvexArea.m
- Software/SAPHIRE Package/Feature Scripts/wcf_ConvexPerimeter.m
- Software/SAPHIRE Package/Feature Scripts/wcf_Eccentricity.m
- Software/SAPHIRE Package/Feature Scripts/wcf_EquivDiameter.m
- Software/SAPHIRE Package/Feature Scripts/wcf_Extent.m
- Software/SAPHIRE Package/Feature Scripts/wcf_FeretCV.m
- Software/SAPHIRE Package/Feature Scripts/wcf_FeretMax.m
- Software/SAPHIRE Package/Feature Scripts/wcf_FeretMean.m
- Software/SAPHIRE Package/Feature Scripts/wcf_FeretMin.m
- Software/SAPHIRE Package/Feature Scripts/wcf_GeoDiameter.m
- Software/SAPHIRE Package/Feature Scripts/wcf_MajorAxisLength.m
- Software/SAPHIRE Package/Feature Scripts/wcf_MinorAxisLength.m
- Software/SAPHIRE Package/Feature Scripts/wcf_Perimeter.m
- Software/SAPHIRE Package/Feature Scripts/wcf_Solidity.m
- Software/SAPHIRE Package/Feature Scripts/wcf_Waviness.m
- Software/SAPHIRE Package/hmm_forward.c
- Software/SAPHIRE Package/hmm_forward.m
- Software/SAPHIRE Package/hmm_forward.mexmaci64
- Software/SAPHIRE Package/hmm_forward.mexw64
- Software/SAPHIRE Package/hmm_forward_entry.c
- Software/SAPHIRE Package/hmm_integration_gaussian.m
- Software/SAPHIRE Package/hmm_mcmc.m
- Software/SAPHIRE Package/hmm_mcmc_initialization.m
- Software/SAPHIRE Package/hmm_param_errors.m
- Software/SAPHIRE Package/hmm_process_cell_trajectory.m
- Software/SAPHIRE Package/hmm_viterbi.m
- Software/SAPHIRE Package/make_hmm_forward_c.m
- Software/SAPHIRE Package/note.txt
- Software/SAPHIRE Package/order_states.m
- Software/SAPHIRE Package/plot_model_results.m
- Software/SAPHIRE Package/sample_simplex.m
- Software/SAPHIRE Package/SAPHIRE ImageProcess GUI/
- Software/SAPHIRE Package/SAPHIRE ImageProcess GUI/SAPHIRE_cellTrajQC_addCBMaskregion.m
- Software/SAPHIRE Package/SAPHIRE ImageProcess GUI/SAPHIRE_cellTrajQC_delEntireTraj.m
- Software/SAPHIRE Package/SAPHIRE ImageProcess GUI/SAPHIRE_cellTrajQC_delFrameinTile.m
- Software/SAPHIRE Package/SAPHIRE ImageProcess GUI/SAPHIRE_cellTrajQC_editCBMask.m
- Software/SAPHIRE Package/SAPHIRE ImageProcess GUI/SAPHIRE_cellTrajQC_editFramePheno.m
- Software/SAPHIRE Package/SAPHIRE ImageProcess GUI/SAPHIRE_cellTrajQC_editSegMaskReg.m
- Software/SAPHIRE Package/SAPHIRE ImageProcess GUI/SAPHIRE_cellTrajQC_finished.m
- Software/SAPHIRE Package/SAPHIRE ImageProcess GUI/SAPHIRE_cellTrajQC_main.m
- Software/SAPHIRE Package/SAPHIRE ImageProcess GUI/SAPHIRE_cellTrajQC_modifyRegions.m
- Software/SAPHIRE Package/SAPHIRE ImageProcess GUI/SAPHIRE_cellTrajQC_plotMain.m
- Software/SAPHIRE Package/SAPHIRE ImageProcess GUI/SAPHIRE_cellTrajQC_remMaskReg.m
- Software/SAPHIRE Package/SAPHIRE ImageProcess GUI/SAPHIRE_cellTrajQC_reset.m
- Software/SAPHIRE Package/SAPHIRE ImageProcess GUI/SAPHIRE_cellTrajQC_SegThreshSet.m
- Software/SAPHIRE Package/SAPHIRE ImageProcess GUI/SAPHIRE_cellTrajQC_zoomOut.m
- Software/SAPHIRE Package/struct2vector.m
- Software/util/
- Software/util/bilateralmap.m
- Software/util/bilateralmap_license.txt
- Software/util/cline.m
- Software/util/cline_license.txt
- Software/util/cm_and_cb_utilities/
- Software/util/cm_and_cb_utilities/cbfit.m
- Software/util/cm_and_cb_utilities/cbfreeze.m
- Software/util/cm_and_cb_utilities/cbhandle.m
- Software/util/cm_and_cb_utilities/cblabel.m
- Software/util/cm_and_cb_utilities/cbunits.m
- Software/util/cm_and_cb_utilities/cmapping.m
- Software/util/cm_and_cb_utilities/cmfit.m
- Software/util/cm_and_cb_utilities/cmjoin.m
- Software/util/cm_and_cb_utilities/cmlines.m
- Software/util/cm_and_cb_utilities/cm_and_cb_utilities.png
- Software/util/cm_and_cb_utilities/Contents.m
- Software/util/cm_and_cb_utilities/license.txt
- Software/util/distinguishable_colors.m
- Software/util/distinguishable_colors_license.txt
- Software/util/draw_std.m
- Software/util/freezeColors.m
- Software/util/freezeColors_license.htm
- Software/util/labmap.m
- Software/util/labmap_license.txt
- Software/util/license.txt
- Software/util/myginput.m
- Software/util/parfor_progress.m
- Software/util/parfor_progress_license.txt
- Software/util/rotateXLabels.m
- Software/util/rotateXLabels_license.txt
- Software/util/tightfig.m
- Software/util/tightfig_license.txt
- Software/util/unfreezeColors.m
