# Supplementary material for: Time series modeling of live-cell shape dynamics for image-based phenotypic profiling
Source: Royal Society of Chemistry journal article supplement (doi:10.1039/c5ib00283d), 2015-11-26
Supplement: c5ib00283d1.zip [file c5ib00283d1.zip › Software/SAPHIRE Package/Feature Scripts/wcf_AxisRatio.m]

%Feature: AxisRatio
%Type: Scalar
%Source: derived from MATLAB regionprops measurements
%Description: major axis length/minor axis length (axis lengths derived
%from best filling ellipse with same second moments as the object).
%Units: none
%
% Author: Simon Gordonov
% Date: 09/30/14

function featVal = wcf_AxisRatio(I,Imask,unitConv)

        feats = regionprops(Imask,{'MajorAxisLength','MinorAxisLength'});
        featVal = feats.MajorAxisLength / feats.MinorAxisLength;
  
