# Supplementary material for: Time series modeling of live-cell shape dynamics for image-based phenotypic profiling
Source: Royal Society of Chemistry journal article supplement (doi:10.1039/c5ib00283d), 2015-11-26
Supplement: c5ib00283d1.zip [file c5ib00283d1.zip › Software/SAPHIRE Package/Feature Scripts/wcf_Circularity.m]

%Feature: Circularity (also called FormFactor)
%Type: Scalar
%Source: derived from MATLAB regionprops measurements
%Description: 4*pi*Area/Perimeter^2, equals 1 for a perfectly circular
%object.
%Units: none
%
% Author: Simon Gordonov
% Date: 09/30/14

function featVal = wcf_Circularity(I,Imask,unitConv)

        feats = regionprops(Imask,{'Area','Perimeter'});
        featVal = (4*pi*feats.Area)/feats.Perimeter^2;
  
