# Supplementary material for: Time series modeling of live-cell shape dynamics for image-based phenotypic profiling
Source: Royal Society of Chemistry journal article supplement (doi:10.1039/c5ib00283d), 2015-11-26
Supplement: c5ib00283d1.zip [file c5ib00283d1.zip › Software/SAPHIRE Package/Feature Scripts/wcf_FeretMin.m]

%Feature: FeretMin
%Type: Scalar
%Source: imFeretDiameters.m by David Legland
%Description: caliper distances of a binary object at given set of angles
%(theta) computed 0 to 179 orientations (degrees). This function outputs
%the minimum value of caliper length from the orientations.
%Units: pixels (or um based on unitConv)
%
% Author: Simon Gordonov
% Date: 09/30/14

function featVal = wcf_FeretMin(I,Imask,unitConv)

        thetas = 0:179;
        diams = imFeretDiameter(Imask,thetas);
        featVal = min(diams);
        
        %Convert to distance units
        featVal = featVal .* unitConv;
