# Supplementary material for: Time series modeling of live-cell shape dynamics for image-based phenotypic profiling
Source: Royal Society of Chemistry journal article supplement (doi:10.1039/c5ib00283d), 2015-11-26
Supplement: c5ib00283d1.zip [file c5ib00283d1.zip › Software/SAPHIRE Package/Feature Scripts/wcf_GeoDiameter.m]

%Feature: geodesic diameter
%Type: Scalar
%Source: David Legland 
%Description: length of the longest geodesic path within a particle. A
%geodesic path is the shortest path (series of neighbor pixels within
%particle) that connects two points in the particle. The geodesic diameter
%is a good alternative to other shape descriptors such as perimeter.
%Units: pixels (or um based on unitConv)
%
% Author: Simon Gordonov
% Date: 09/30/14

function featVal = wcf_GeoDiameter(I,Imask,unitConv)

        featVal = imGeodesicDiameter(Imask);
        %Convert to distance units:
        featVal = featVal * unitConv;
