# Supplementary material for: Time series modeling of live-cell shape dynamics for image-based phenotypic profiling
Source: Royal Society of Chemistry journal article supplement (doi:10.1039/c5ib00283d), 2015-11-26
Supplement: c5ib00283d1.zip [file c5ib00283d1.zip › Software/SAPHIRE Package/make_hmm_forward_c.m]

function [ output_args ] = make_hmm_forward_c( input_args )
    mex hmm_forward_entry.c hmm_forward.c -output hmm_forward
end
