# Supplementary material for: Time series modeling of live-cell shape dynamics for image-based phenotypic profiling
Source: Royal Society of Chemistry journal article supplement (doi:10.1039/c5ib00283d), 2015-11-26
Supplement: c5ib00283d1.zip [file c5ib00283d1.zip › Software/SAPHIRE Package/note.txt]

Compile the C version of hmm_forward to get an execution speedup.

http://www.mathworks.com/support/compilers/R2014b/index.html;jsessionid=4a66ec0c9fcc1c10d6797c88872a

Run make_hmm_forward_c.m
