# Supplementary material for: Time series modeling of live-cell shape dynamics for image-based phenotypic profiling
Source: Royal Society of Chemistry journal article supplement (doi:10.1039/c5ib00283d), 2015-11-26
Supplement: c5ib00283d1.zip [file c5ib00283d1.zip › Software/SAPHIRE Package/struct2vector.m]

function list = struct2vector(structure,field,varargin)

list = reshape([structure.(field)],[size(structure(1).(field)) length(structure)]);

if nargin == 3
    if size(list,1)==1
        list = squeeze(list(1,varargin{1},:));
    else
        list = squeeze(list(varargin{1},1,:));
    end
    
elseif nargin == 4
    list = squeeze(list(varargin{1},varargin{2},:));

end


end
