# Supplementary material for: Time series modeling of live-cell shape dynamics for image-based phenotypic profiling
Source: Royal Society of Chemistry journal article supplement (doi:10.1039/c5ib00283d), 2015-11-26
Supplement: c5ib00283d1.zip [file c5ib00283d1.zip › Software/util/cline.m]

% This function plots a 3D line (x,y,z) encoded with scalar color data (c)
% using the specified colormap (default=jet);
%
% SYNTAX: h=cline(x,y,z,c,colormap);
%
% DBE 09/03/02

function h=cline(x,y,z,c,cmap,linewidth)

if ~exist('linewidth','var')
    linewidth = 1;
end

if nargin==0  % Generate sample data...
  x=linspace(-10,10,101);
  y=2*x.^2+3;
  z=sin(0.1*pi*x);
  c=exp(z);
  w=z-min(z)+1;
  cmap='jet';
elseif nargin<4
  fprintf('Insufficient input arguments\n');
  return;
elseif nargin==4
  cmap='jet';
end
% if ~any(c - c(1))
% 
%     cm = repmat(cmap(1,:)',1,length(z)-1);
%     
% else
%     cmap=colormap(cmap);                      % Set colormap
%     yy=linspace(min(c),max(c),size(cmap,1));  % Generate range of color indices that map to cmap
%     cm = spline(yy,cmap',c);                  % Find interpolated colorvalue
%     cm(cm>1)=1;                               % Sometimes iterpolation gives values that are out of [0,1] range...
%     cm(cm<0)=0;
% end


% Lot line segment with appropriate color for each data pair...
  for i=1:length(z)-1
    h(i)=line([x(i) x(i+1)],[y(i) y(i+1)],[z(i) z(i+1)],'color',[cmap(c(i),:)],'LineWidth',linewidth);
  end

return
