# Supplementary material for: Time series modeling of live-cell shape dynamics for image-based phenotypic profiling
Source: Royal Society of Chemistry journal article supplement (doi:10.1039/c5ib00283d), 2015-11-26
Supplement: c5ib00283d1.zip [file c5ib00283d1.zip › Software/util/cm_and_cb_utilities/Contents.m]

% Utilities for coloring with MATLAB by Carlos Vargas.
%
% COLORMAP utilites:
%   cmapping - Colormap linear mapping/interpolation.                        v1.1    (Sep 02, 2009)
%   cmfit    - Sets the COLORMAP and CAXIS to specific color bands.          v1.0    (Jun 08, 2009)
%   cmjoin   - Joins colormaps at certain levels.                            v2.0    (Jun 08, 2009)
%   cmlines  - Change the color of plotted lines using the colormap.         v1.0    (Jun 08, 2009)
%
% COLORBAR utilities:
%   cbfit    - Changes COLORMAP and CAXIS to fit between colorbar's ticks.   v3.0    (Jun 05, 2014)
%   cbfreeze - Freezes the colormap of a colorbar.                           v2.1    (Jul 03, 2014)
%   cbhandle - Gets the handle of current colorbar or its peer axes.         v2.1    (Jul 03, 2014)
%   cblabel  - Adds a label to the colorbar.                                 v2.2    (Jul 03, 2014)
%   cbunits  - Adds units (and ISU prefixes) to the colorbar ticklabels.     v4.4    (Jul 03, 2014)
%
% Jul 03, 2014
